# Supplementary material for: Bioassay-Guided Isolation of Iridoid Glucosides from Stenaria nigricans, Their Biting Deterrence against Aedes aegypti (Diptera: Culicidae), and Repellency Assessment against Imported Fire Ants (Hymenoptera: Formicidae)
Source: MDPI journal article supplement (doi:10.3390/molecules27207053), 2022-10-19
Supplement: s1 [file s1]

# Bioassay-Guided Isolation of Iridoid Glucosides from *Stenaria nigricans*, Their Biting Deterrence Against *Aedes aegypti* (Diptera: Culicidae) and Repellency Assessment Against Imported Fire Ants (Hymenoptera: Formicidae)

Fazila Zulfiqar <sup>1</sup>, Abbas Ali <sup>1</sup>, Zulfiqar Ali <sup>1</sup> and Ikhlas A. Khan <sup>1,2,\*</sup>

<sup>1</sup> National Center for Natural Products Research, School of Pharmacy, The University of Mississippi, Oxford, MS 38677, USA

<sup>2</sup> Department of BioMolecular Sciences, Division of Pharmacognosy, School of Pharmacy, The University of Mississippi, Oxford, MS 38677, USA

\* Correspondence: ikhan@olemiss.edu; Tel.: +1-(662)-915-1090.

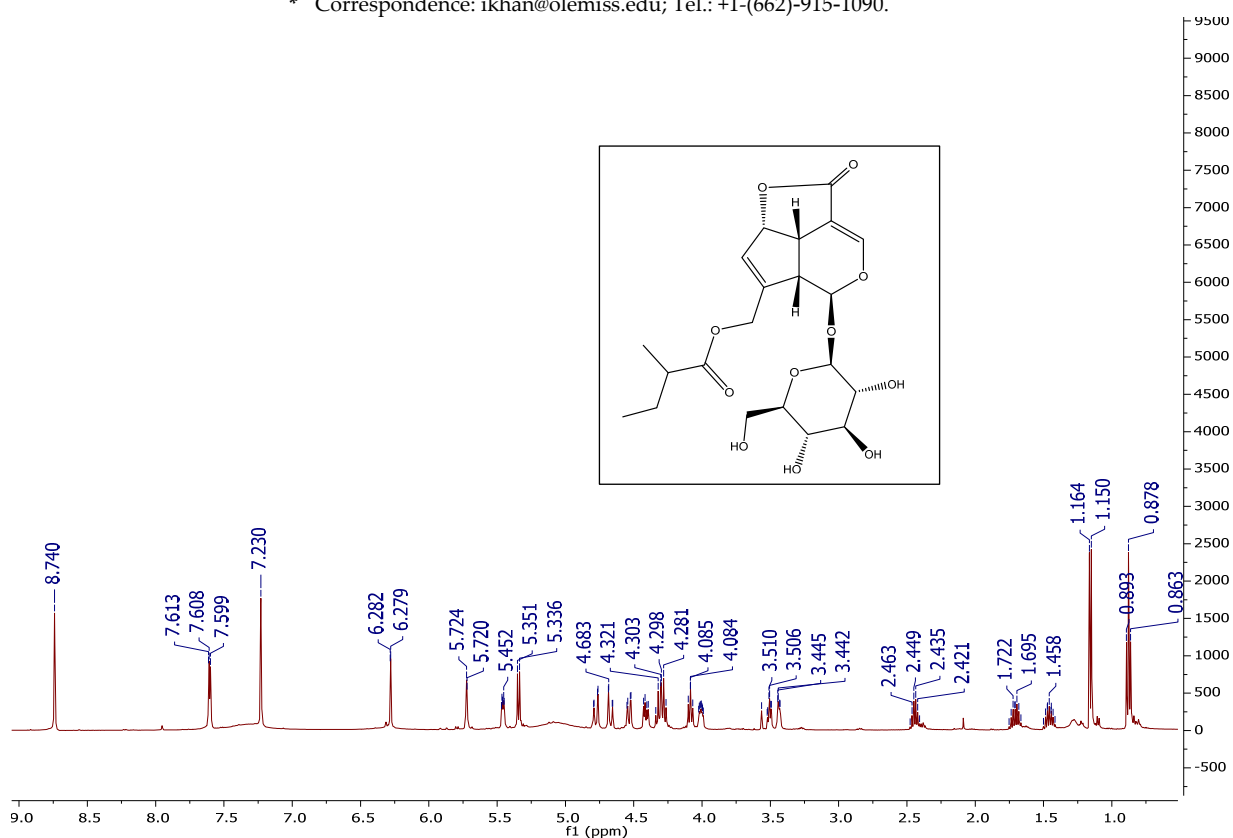

**Figure S1.** <sup>1</sup>H NMR spectrum of **1** at 500 MHz in pyridine-*d*<sub>5</sub>.

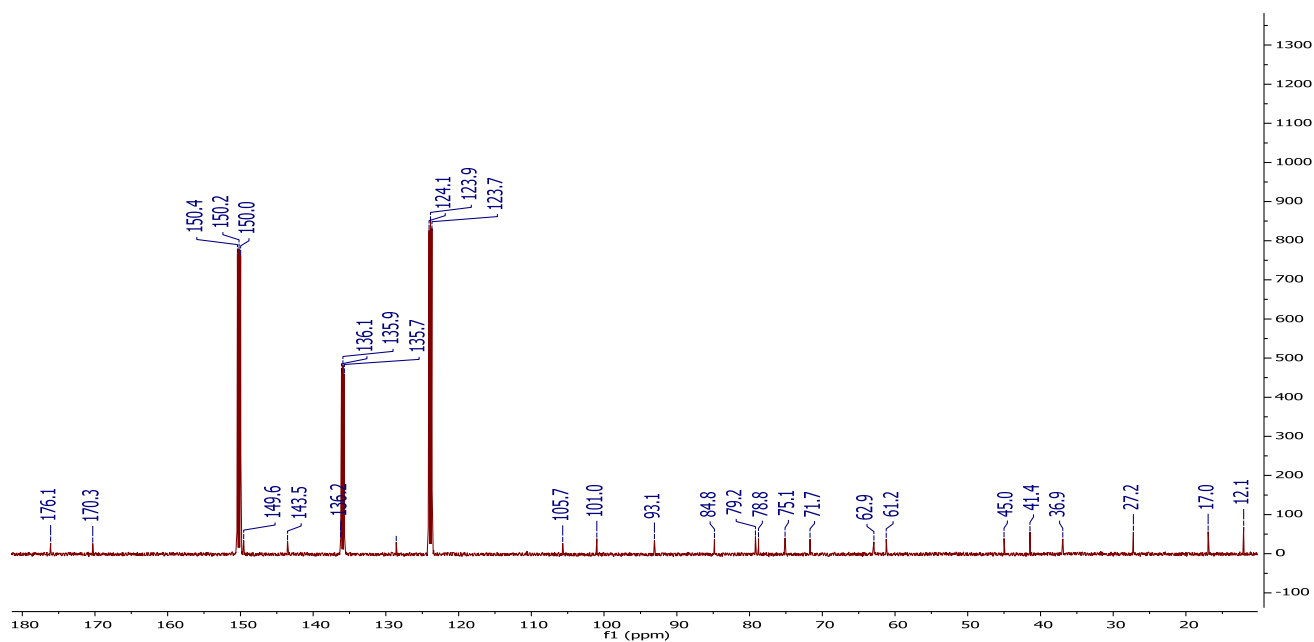

Figure S2. <sup>13</sup>CNMR spectrum of 1 at 125 MHz in pyridine-*d*<sub>5</sub>.

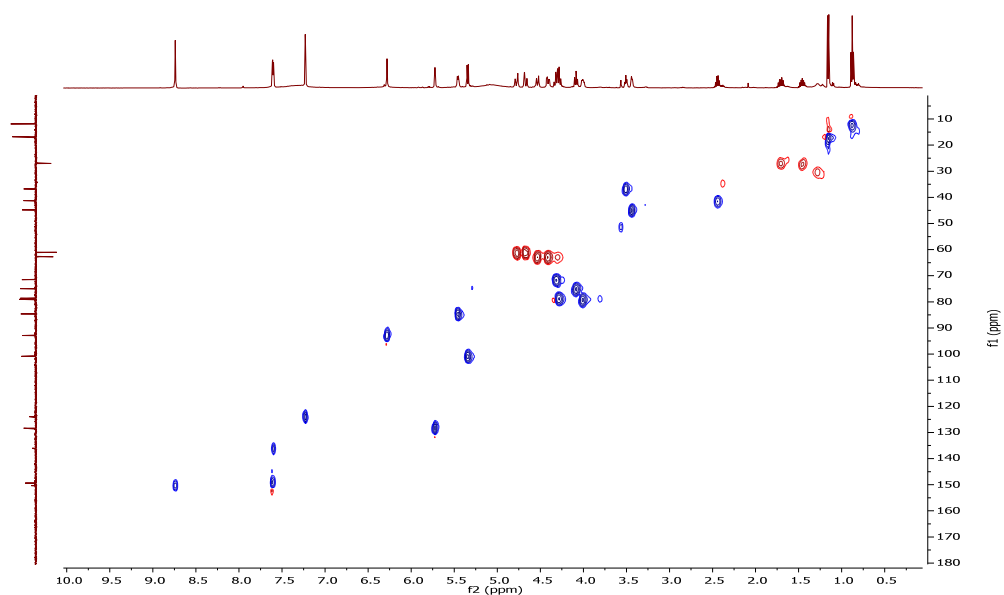

Figure S3. HSQC spectrum of 1 in pyridine-*d*<sub>5</sub>.

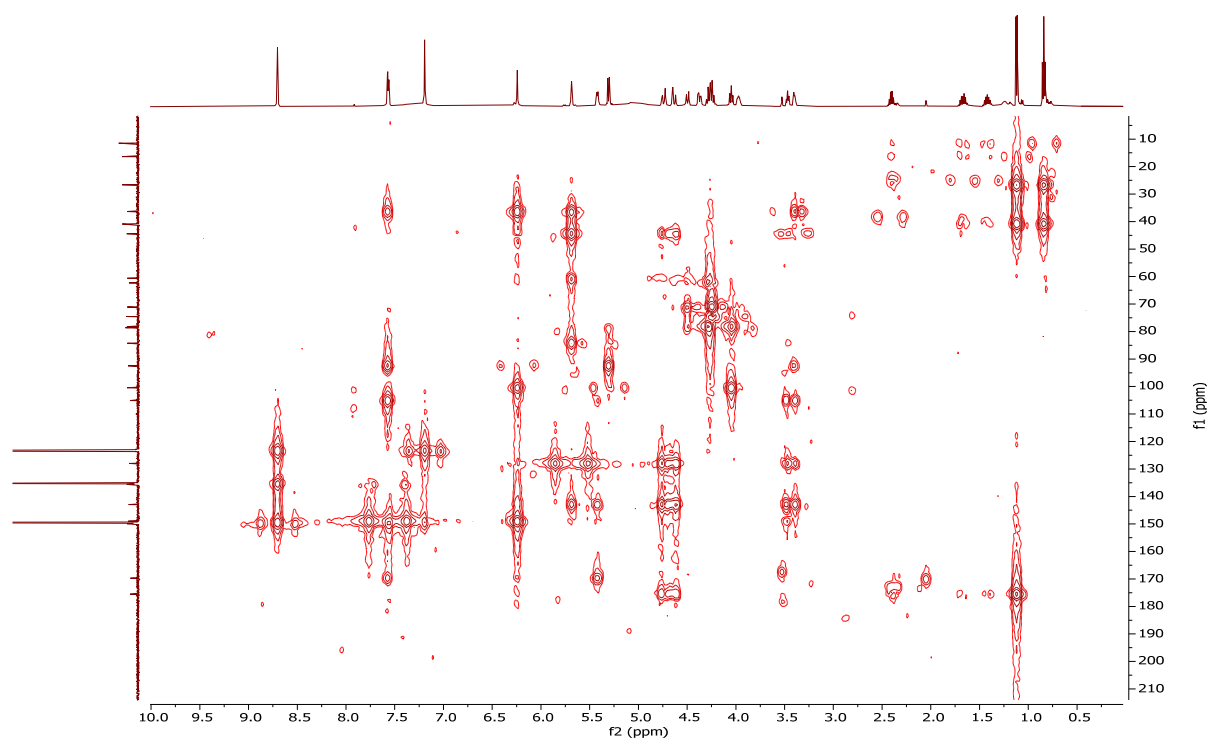

Figure S4. HMBC spectrum of **1** in pyridine-*d*<sub>5</sub>.

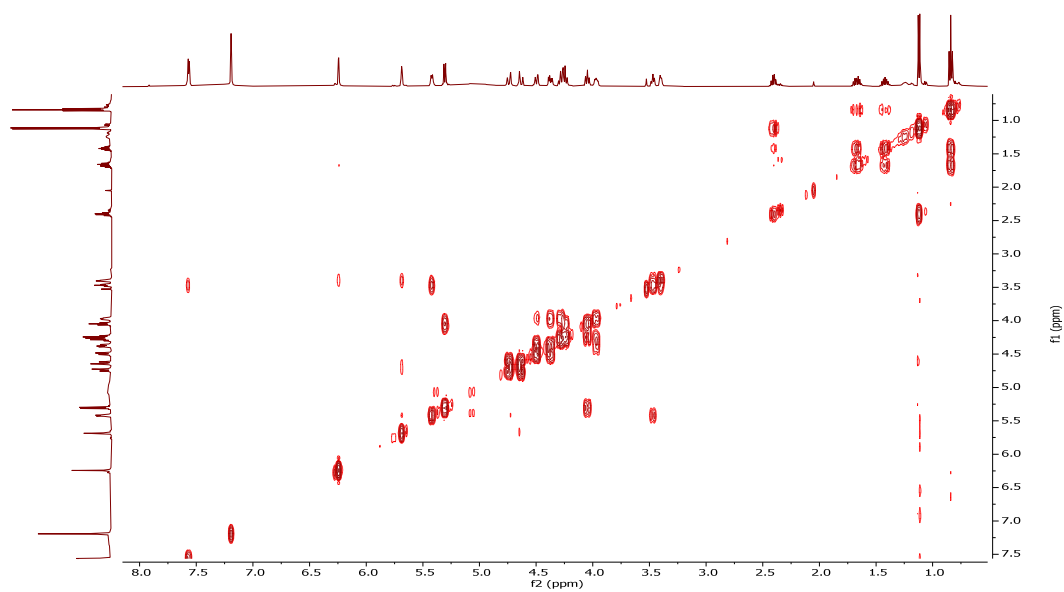

Figure S5. COSY spectrum of **1** in pyridine-*d*<sub>5</sub>.

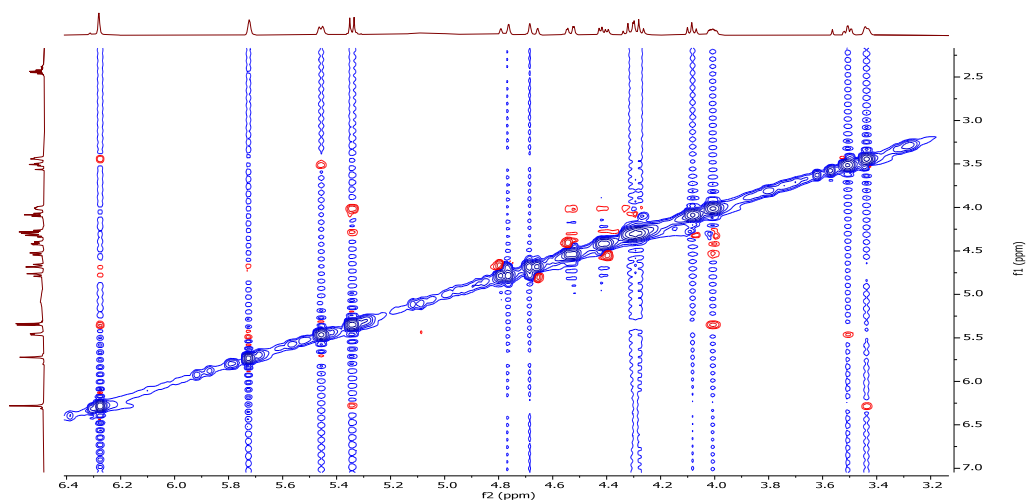

Figure S6. NOESY spectrum of **1** in pyridine-*d*<sub>5</sub>.

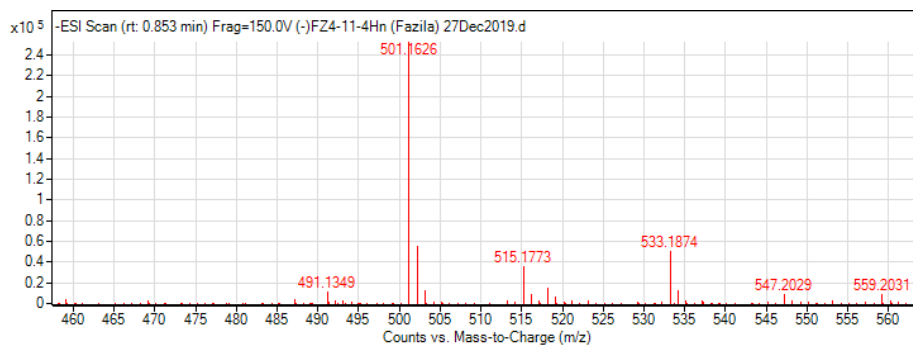

Figure S7. HRESIMS (negative ionization mode) of **1**.

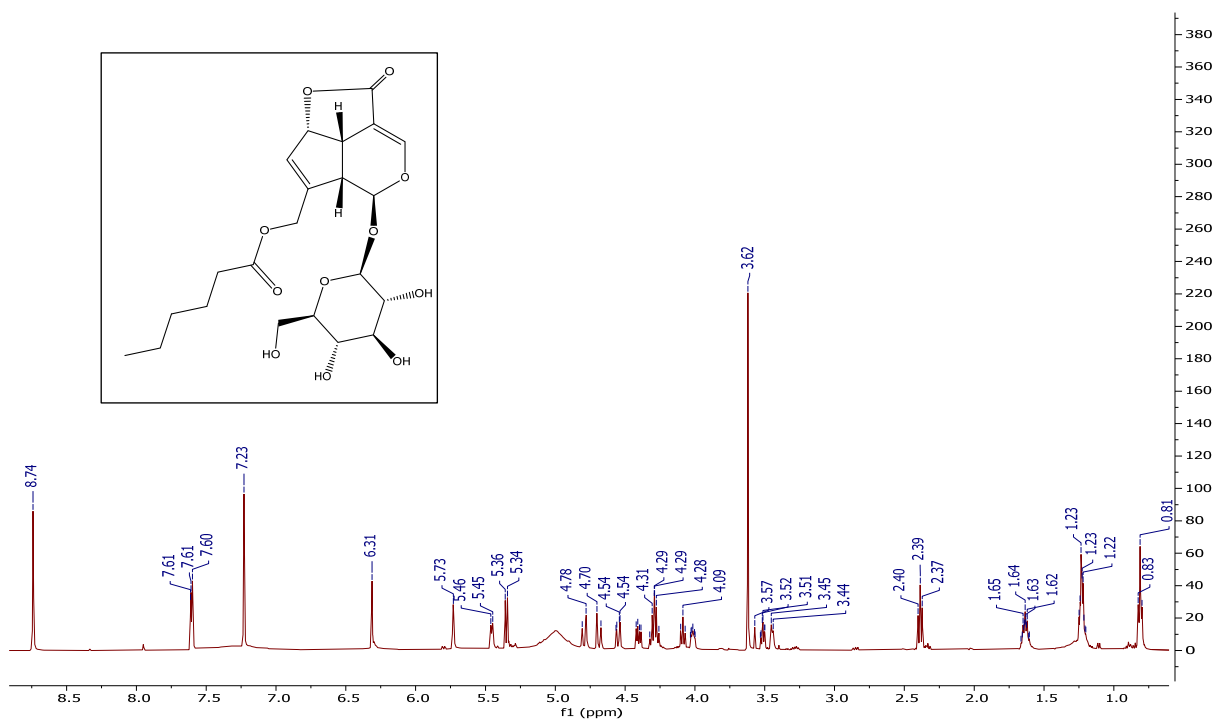

Figure S8. <sup>1</sup>H NMR spectrum of **2** at 500 MHz in pyridine-*d*<sub>5</sub>.

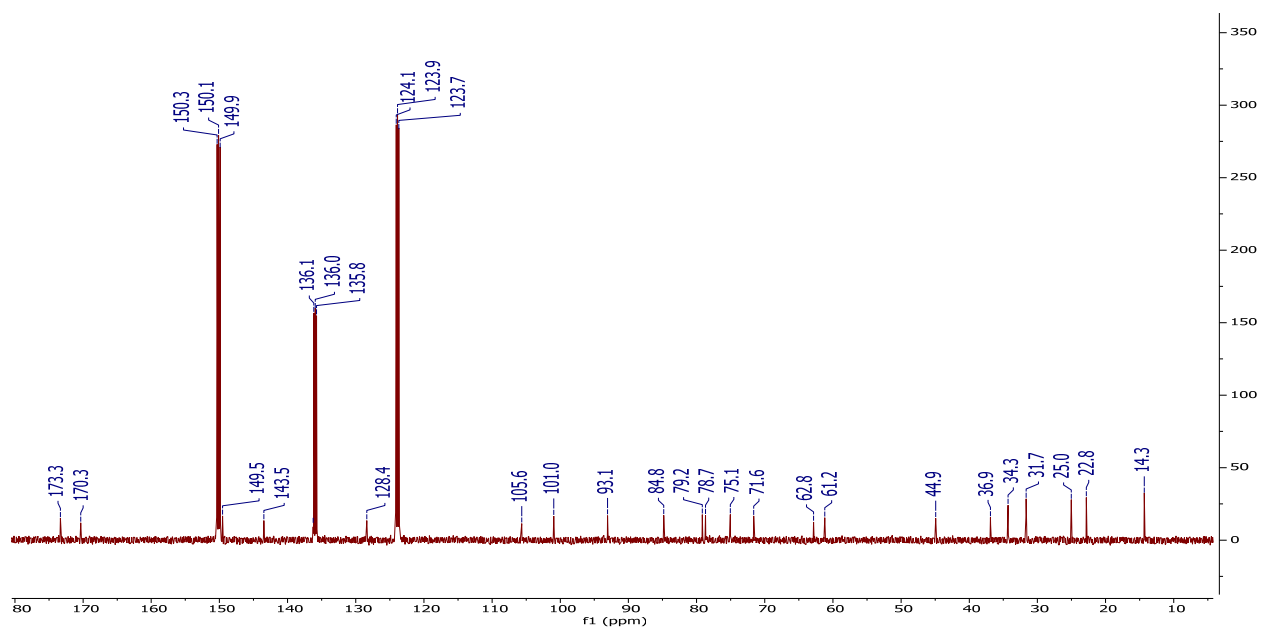

Figure S9. <sup>13</sup>CNMR spectrum of 2 at 125 MHz in pyridine-*d*<sub>5</sub>.

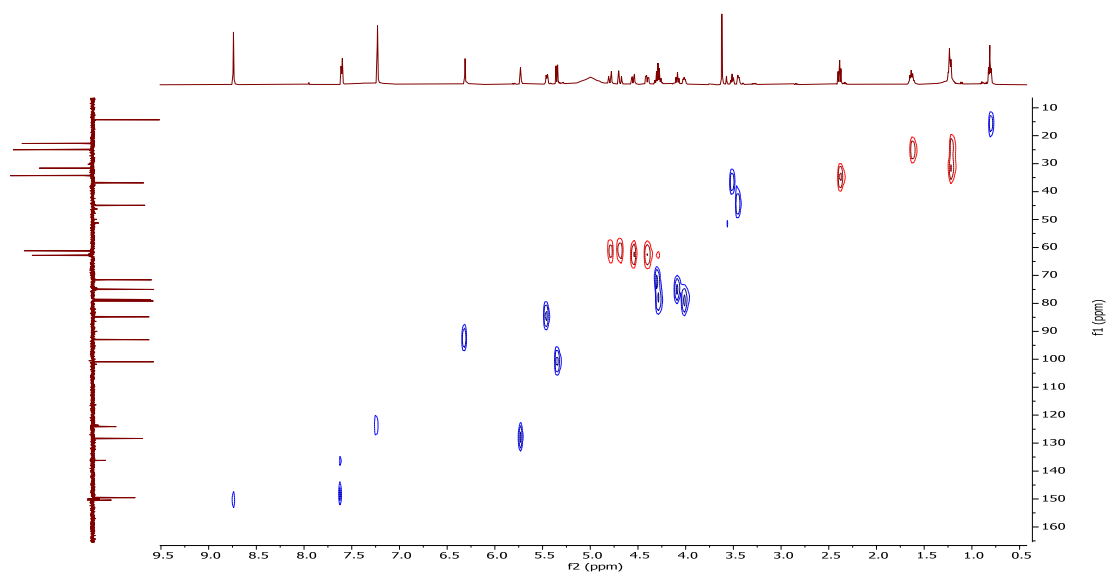

Figure S10. HSQC spectrum of 2 in pyridine-*d*<sub>5</sub>.

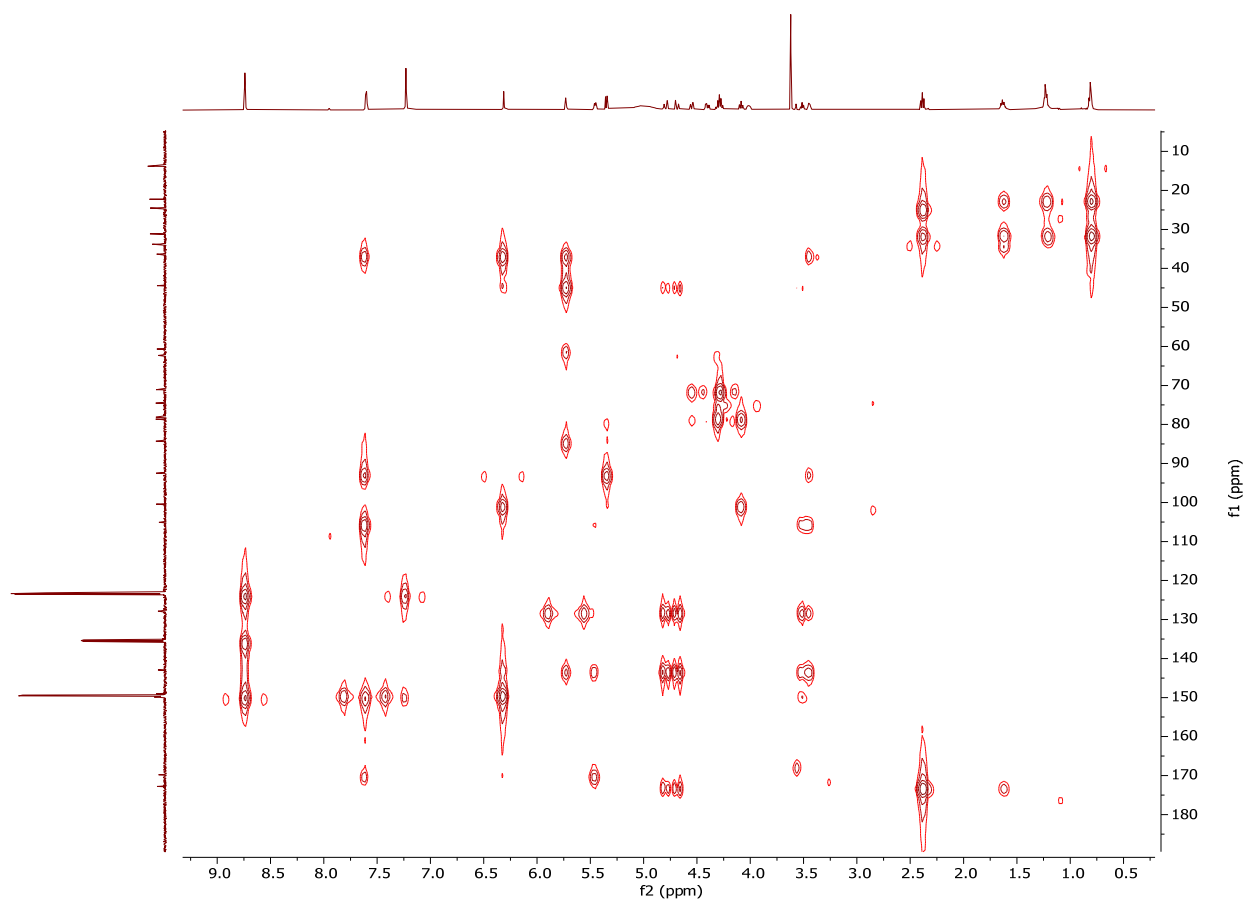

Figure S11. HMBC spectrum of **2** in pyridine-*d*<sub>5</sub>.

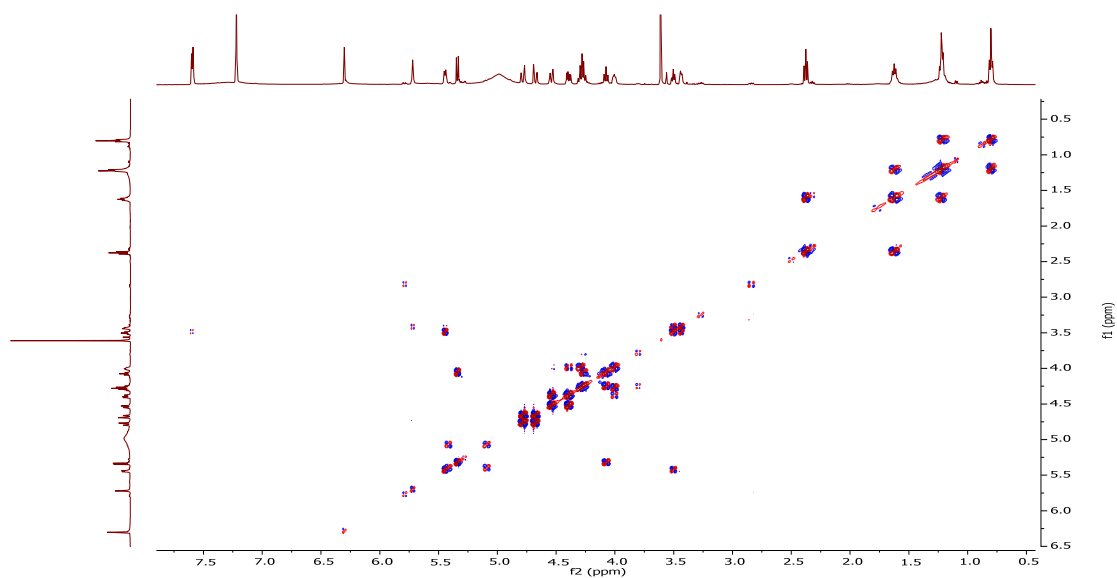

Figure S12. COSY spectrum of **2** in pyridine-*d*<sub>5</sub>.

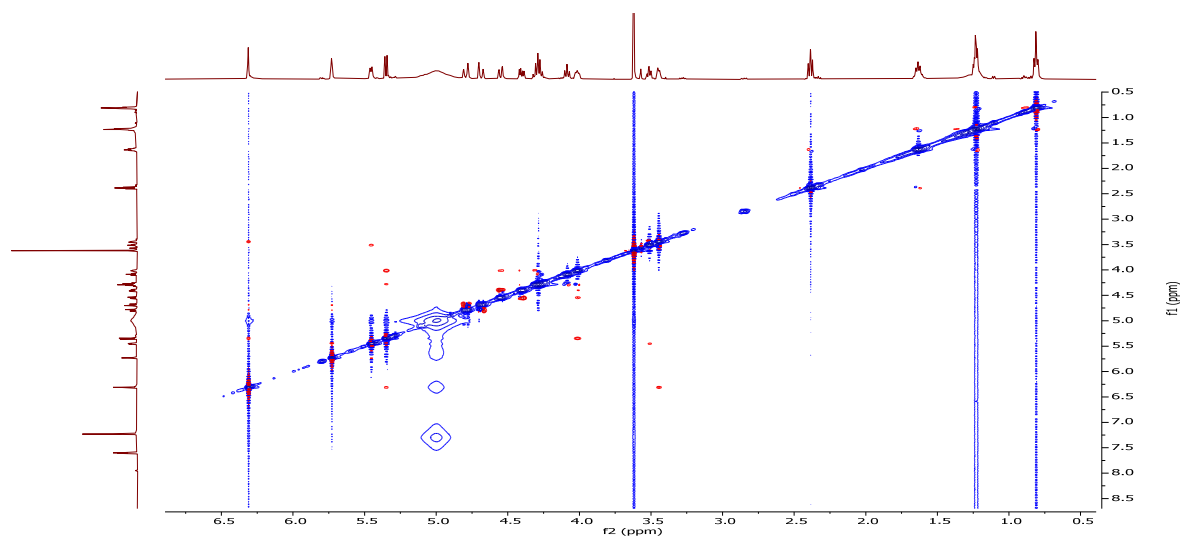

Figure S13. NOESY spectrum of **2** in pyridine-*d*<sub>5</sub>.

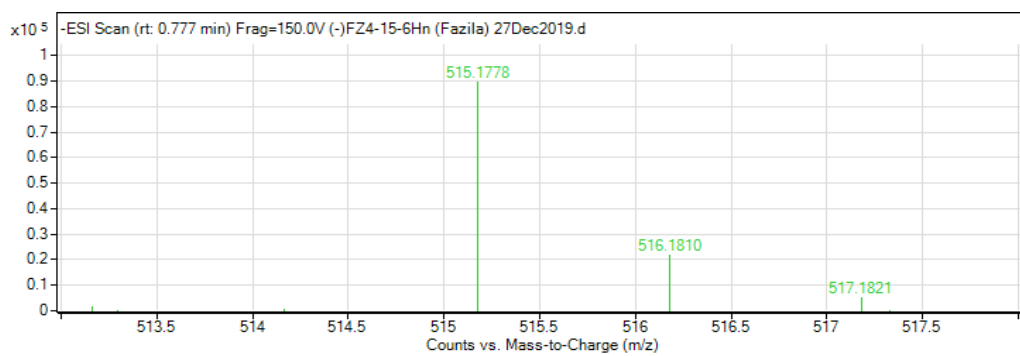

Figure S14. HRESIMS of **2**.

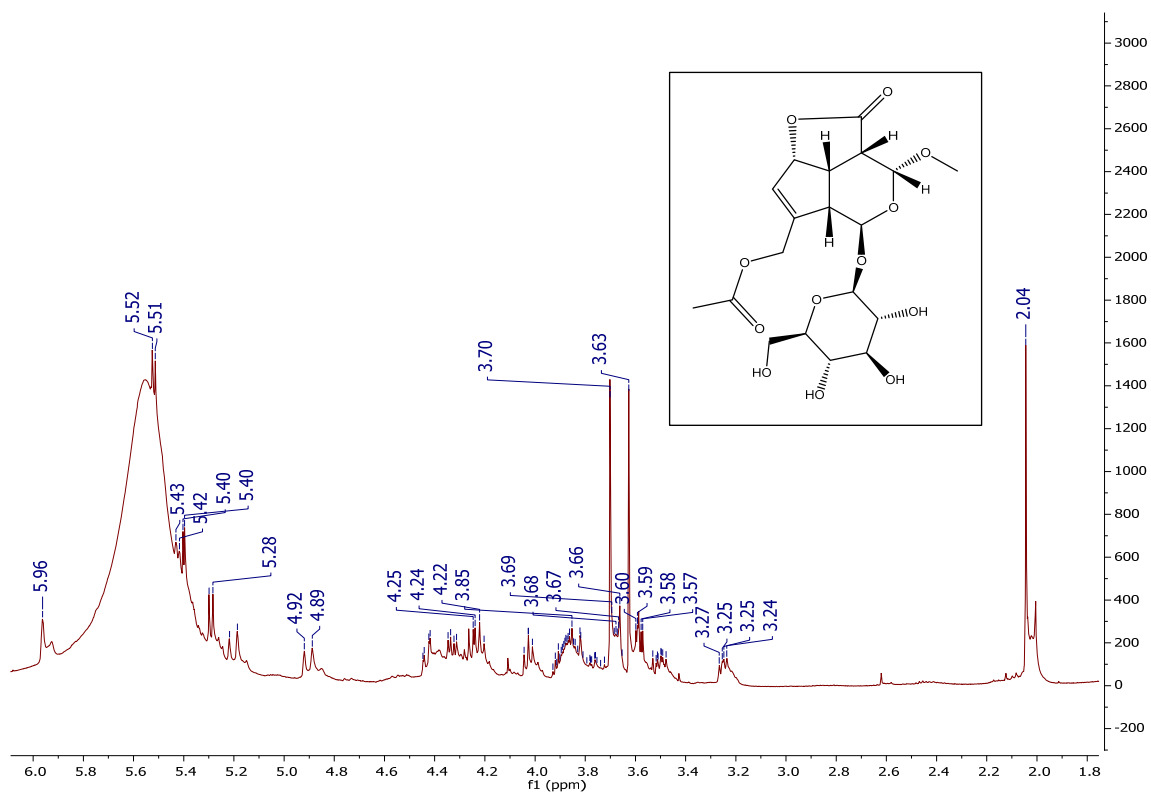

Figure S15. <sup>1</sup>H NMR spectrum of **3** at 500 MHz in pyridine-*d*<sub>5</sub>.

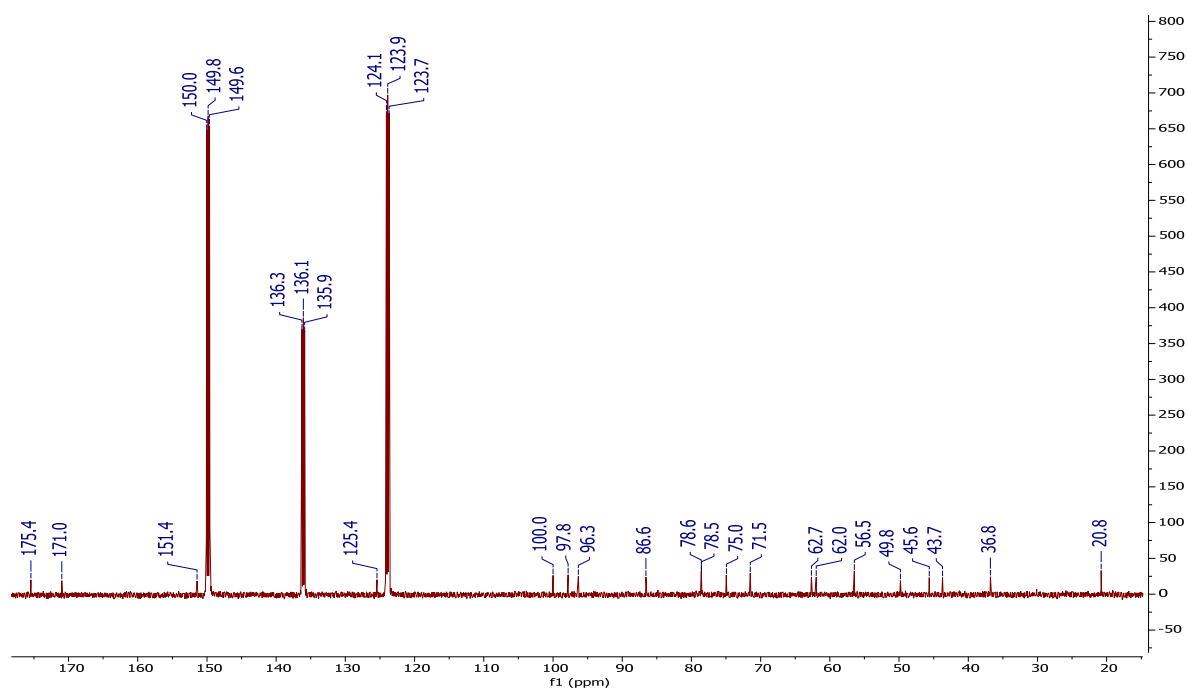

Figure S16. <sup>13</sup>C NMR spectrum of 3 at 125 MHz in pyridine-*d*<sub>5</sub>.

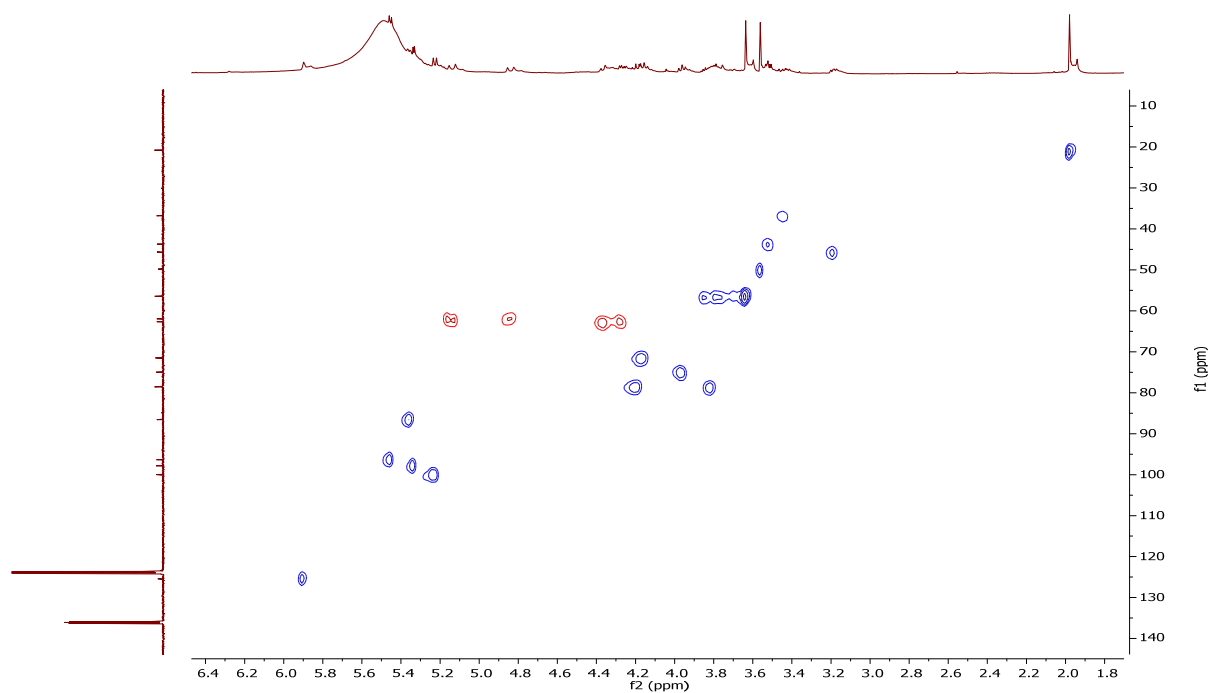

Figure S17. HSQC spectrum of 3 in pyridine-*d*<sub>5</sub>.



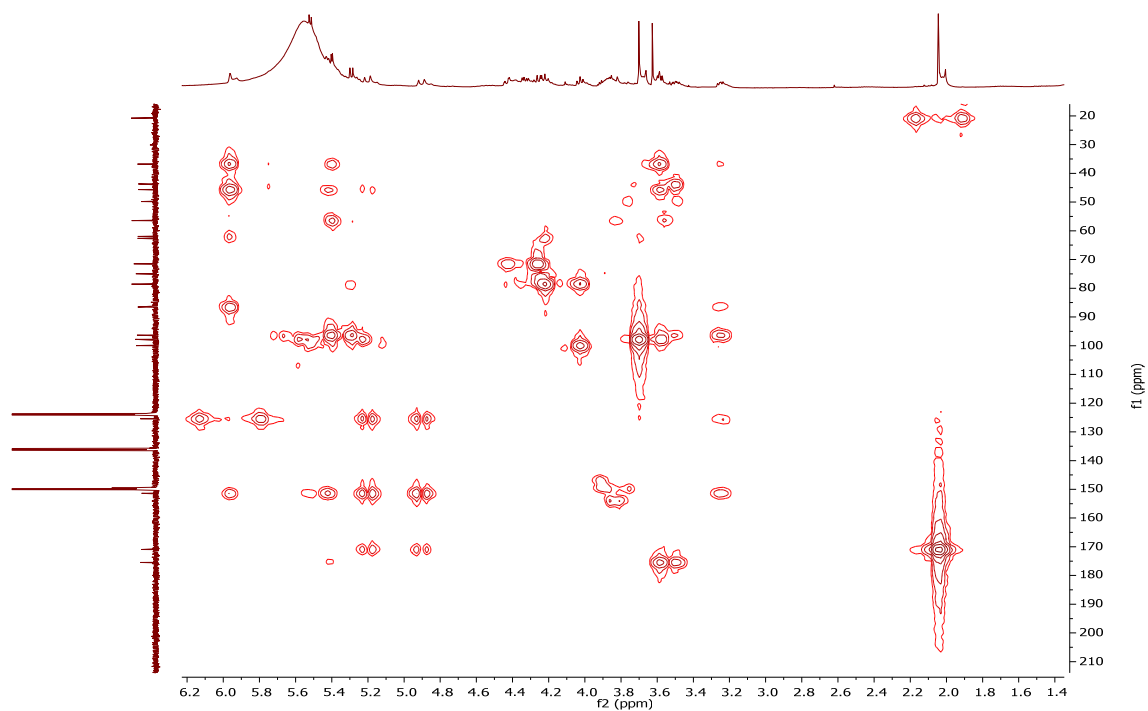

Figure S18. HMBC spectrum of **3** in pyridine-*d*<sub>5</sub>.

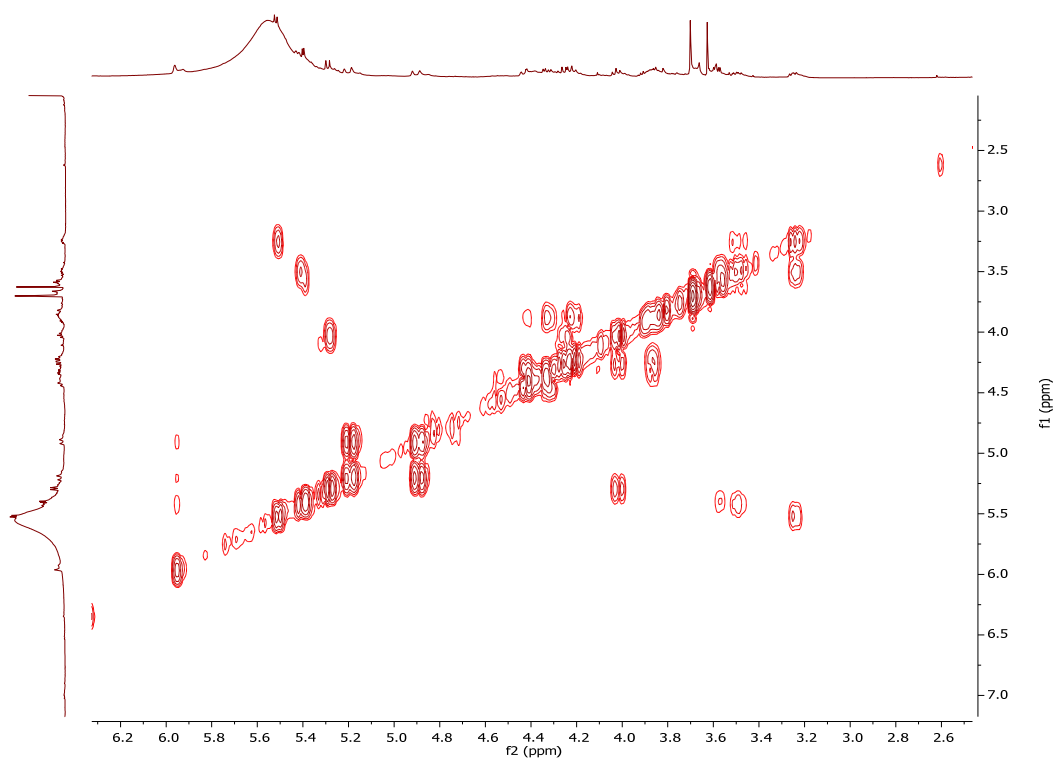

Figure S19. COSY spectrum of **3** in pyridine-*d*<sub>5</sub>.

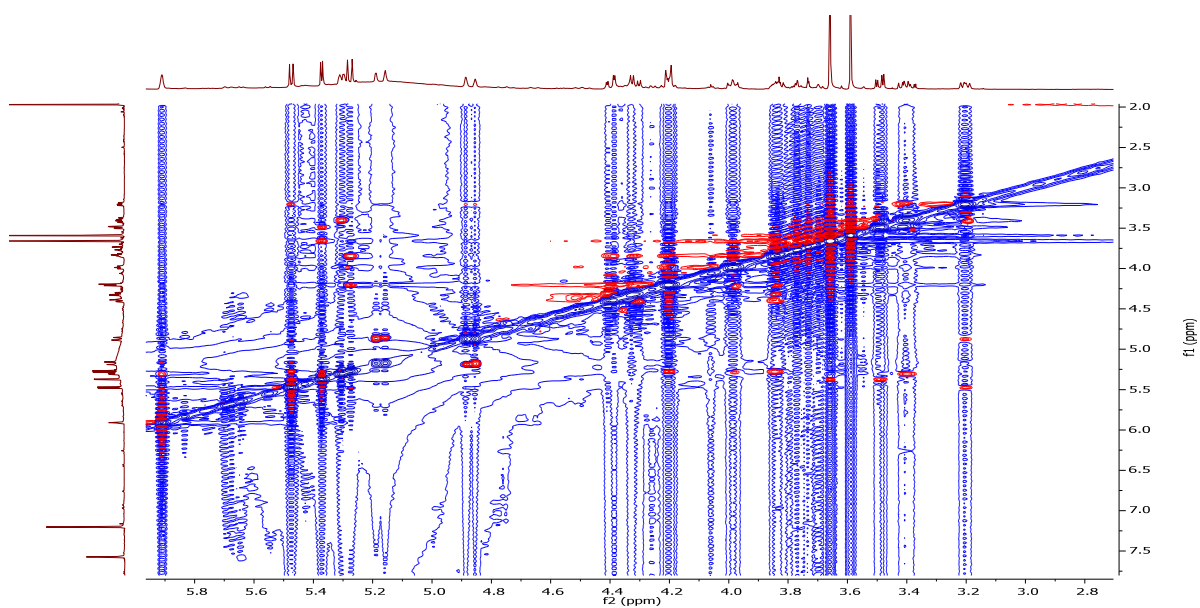

Figure S20. NOESY spectrum of **3** in pyridine- $d_5$ .

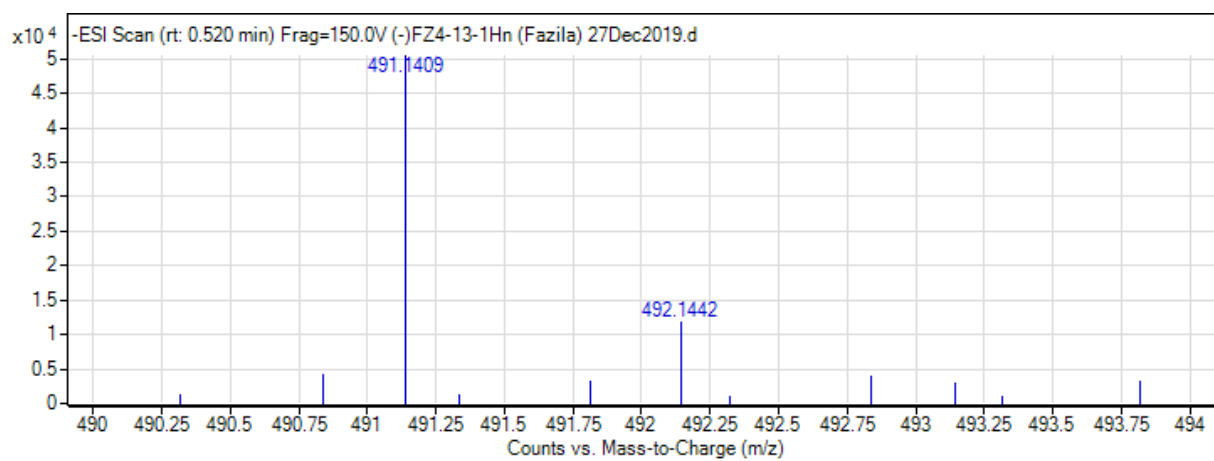

Figure S21. HRESIMS of **3**.

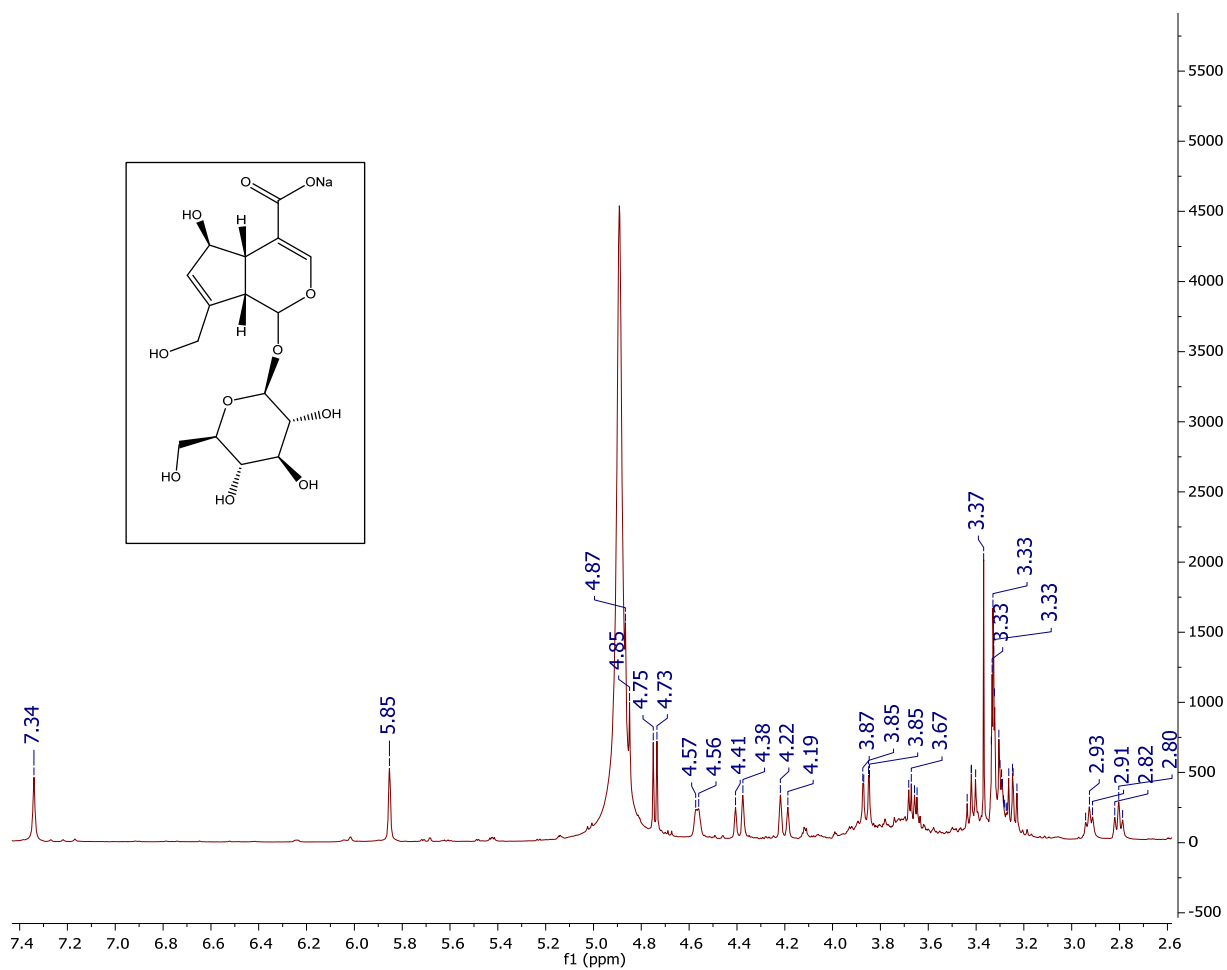

Figure S22. <sup>1</sup>H NMR spectrum of **4** in CD<sub>3</sub>OD.

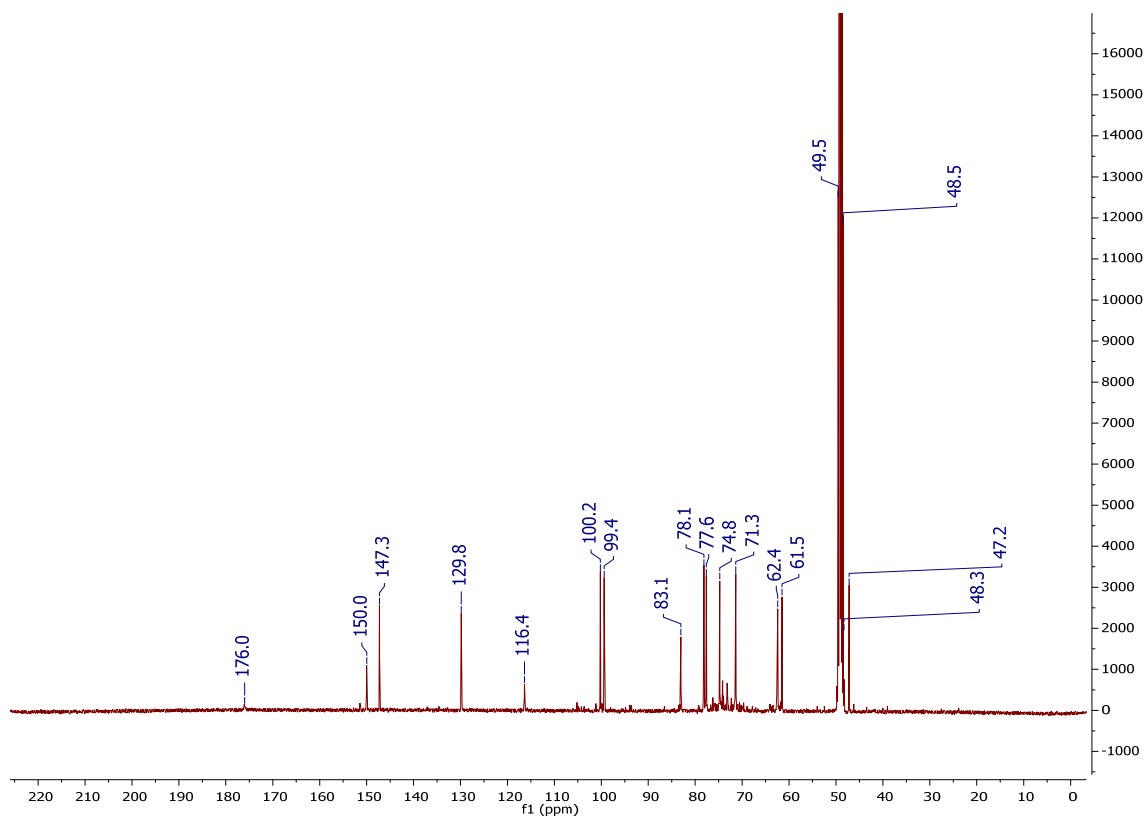

Figure S23. <sup>13</sup>C NMR spectrum of **4** in CD<sub>3</sub>OD.

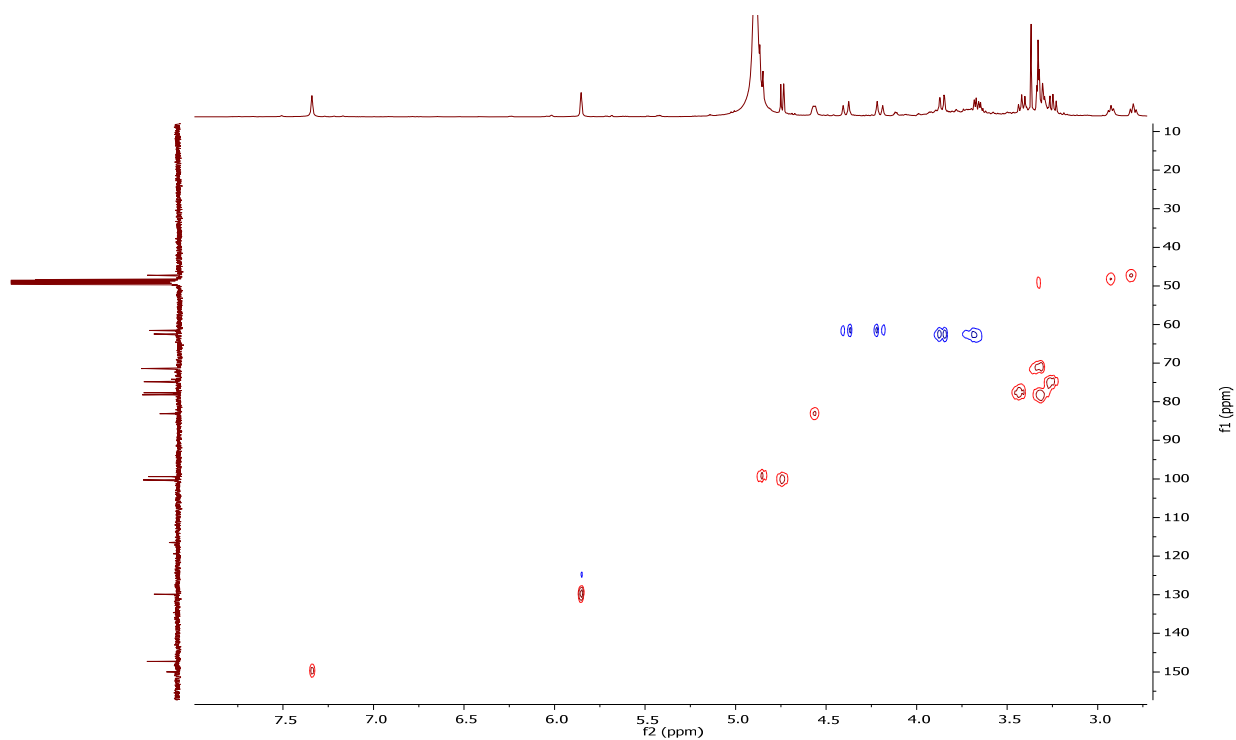

Figure S24. HSQC spectrum of **4** in CD<sub>3</sub>OD.

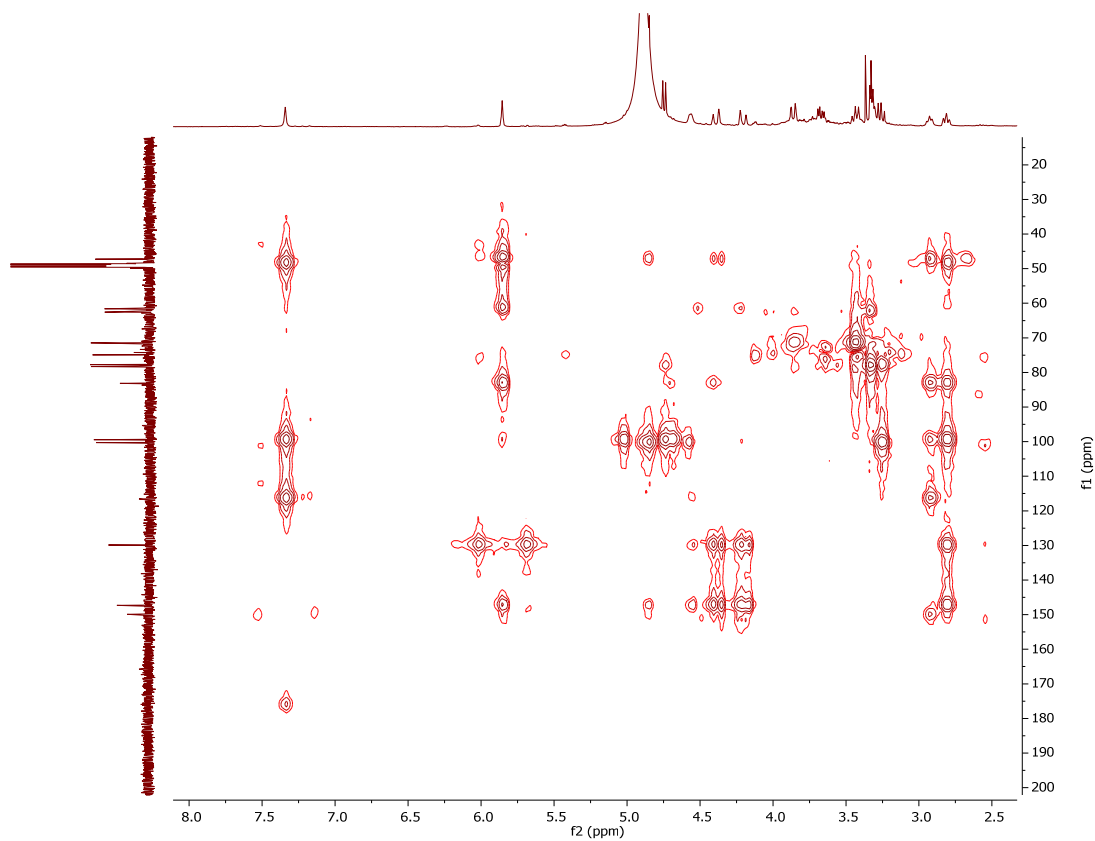

Figure S25. HMBC spectrum of **4** in CD<sub>3</sub>OD.

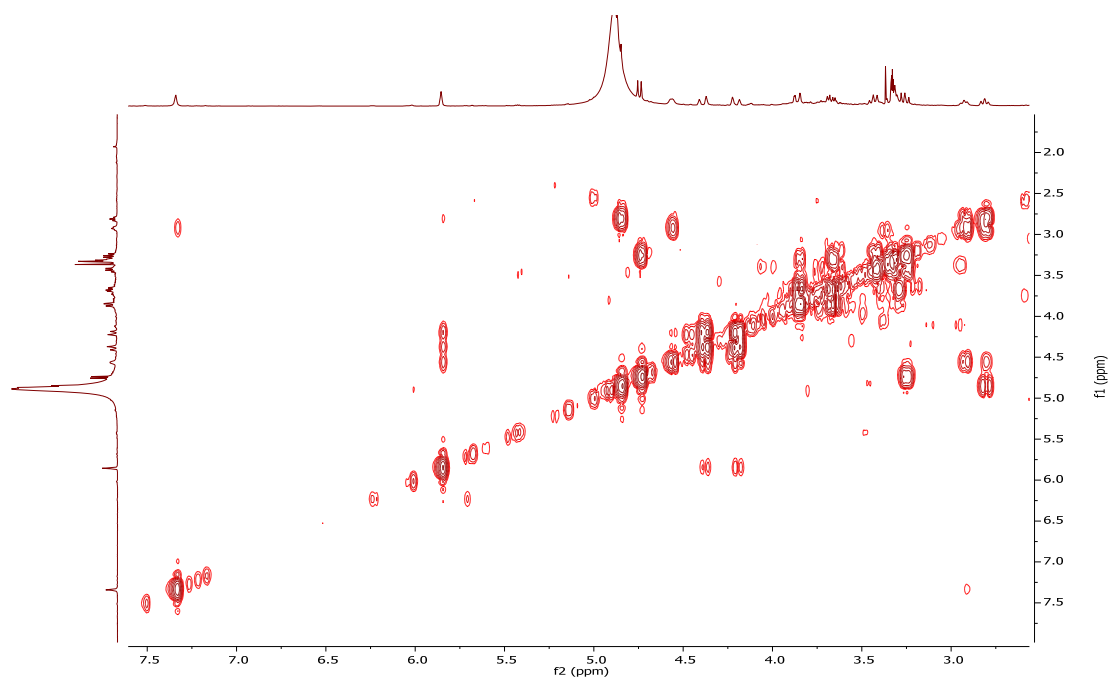

Figure S26. COSY spectrum of 4 in CD<sub>3</sub>OD.

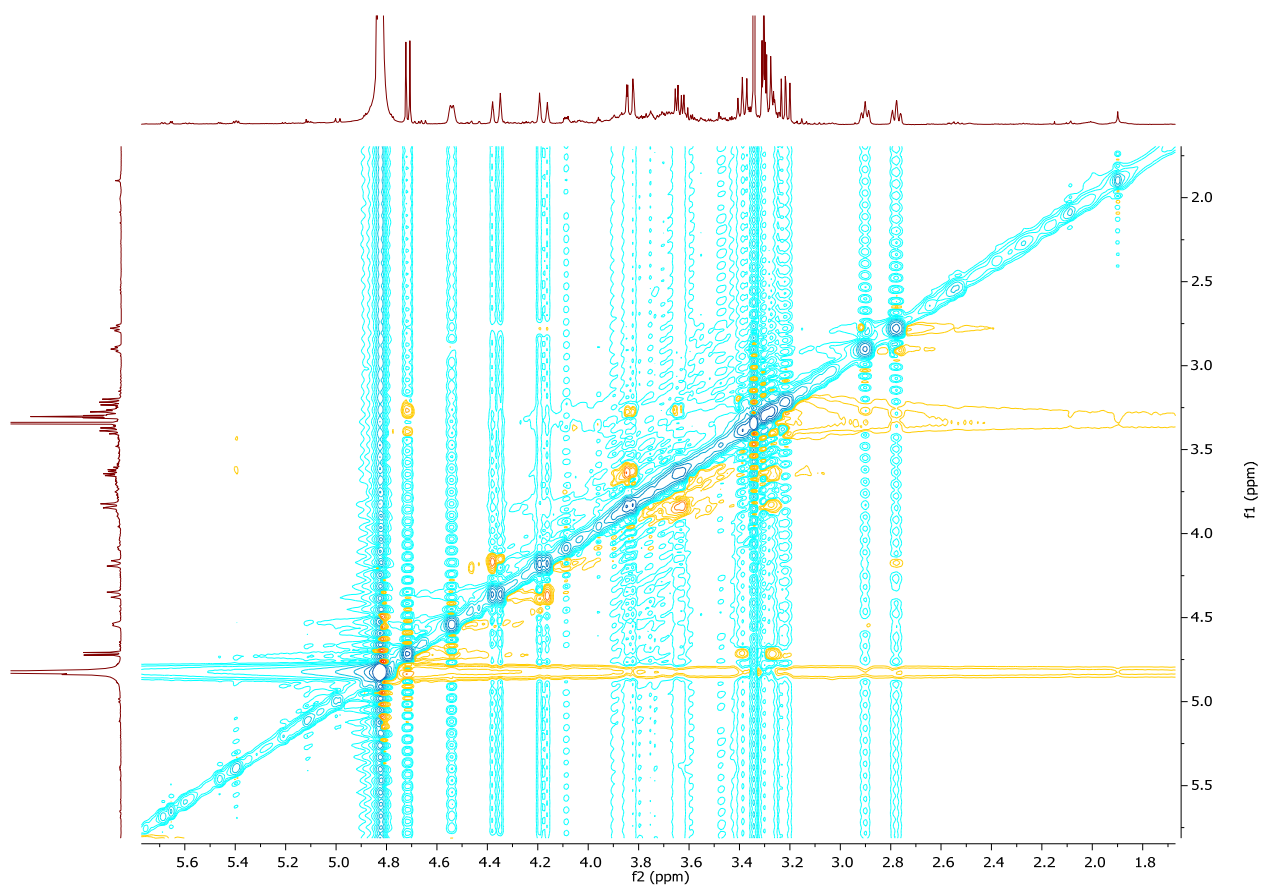

Figure S27. NOESY spectrum of 4 in CD<sub>3</sub>OD.

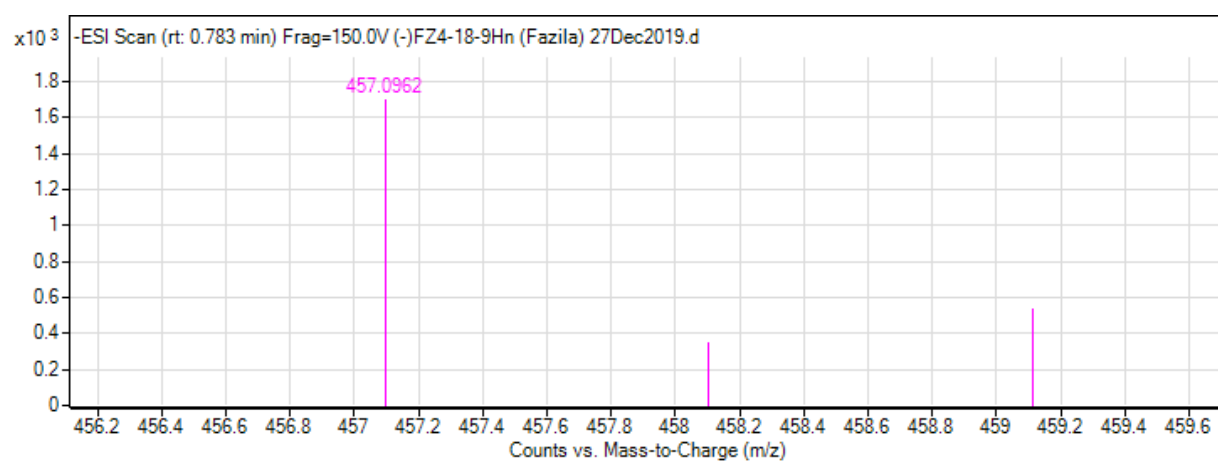

Figure S28. HRESIMS of 4.
